# Supplementary material
Source: PubMed Central journal article supplement (PMC37467)

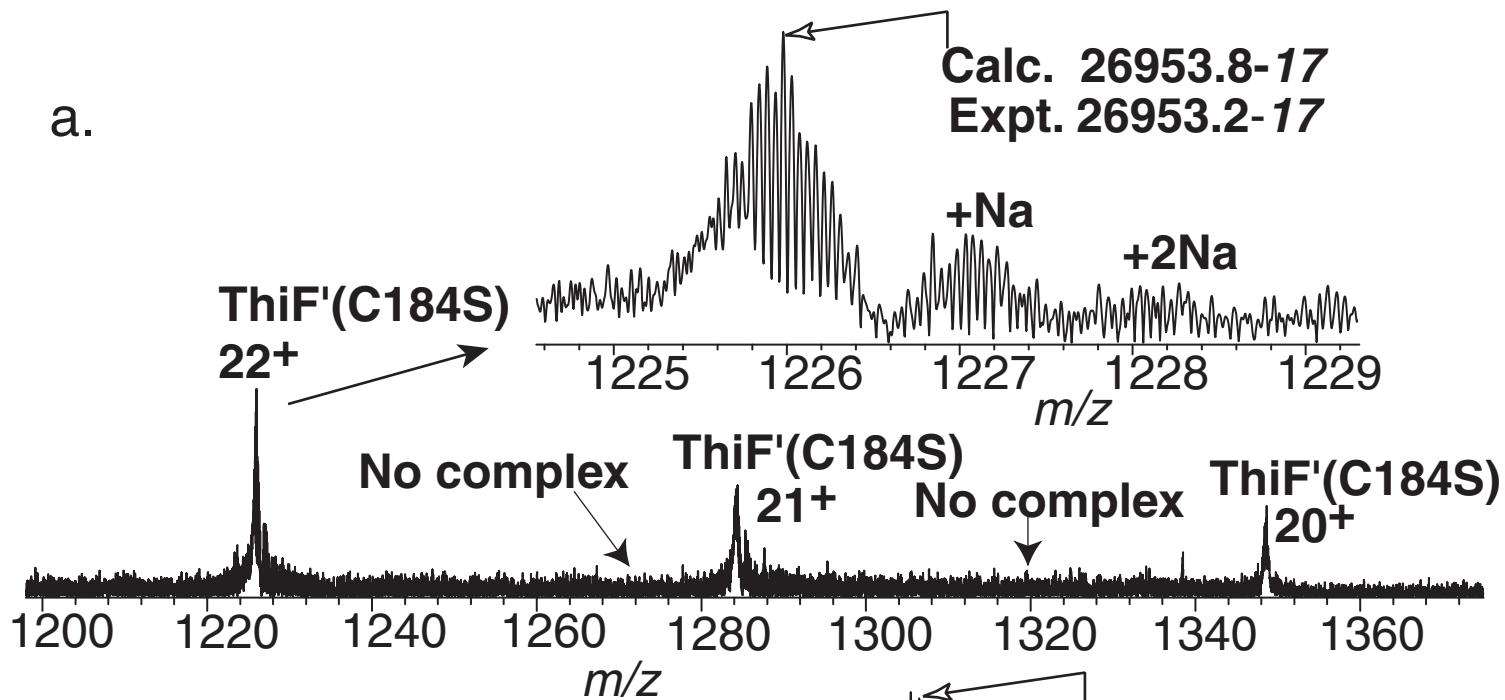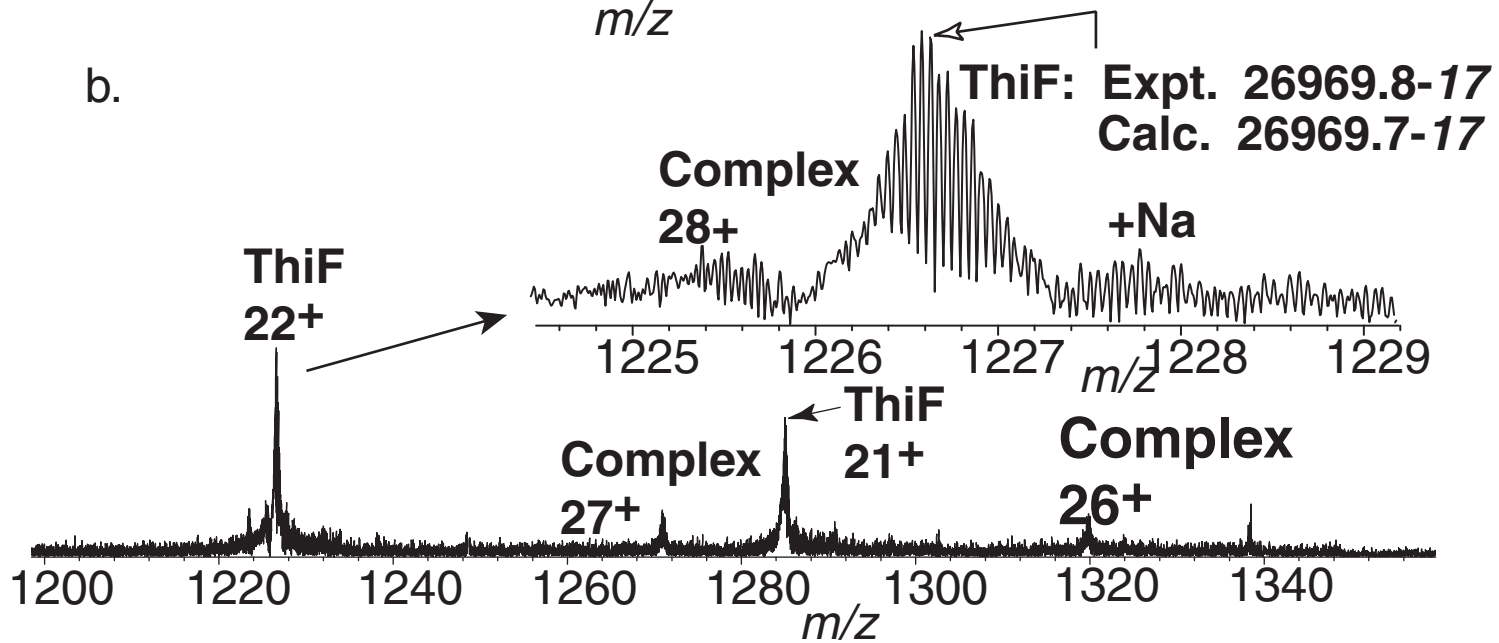

Supplement: pnas_141226698_2.pdf [file pnas_141226698_2.pdf]

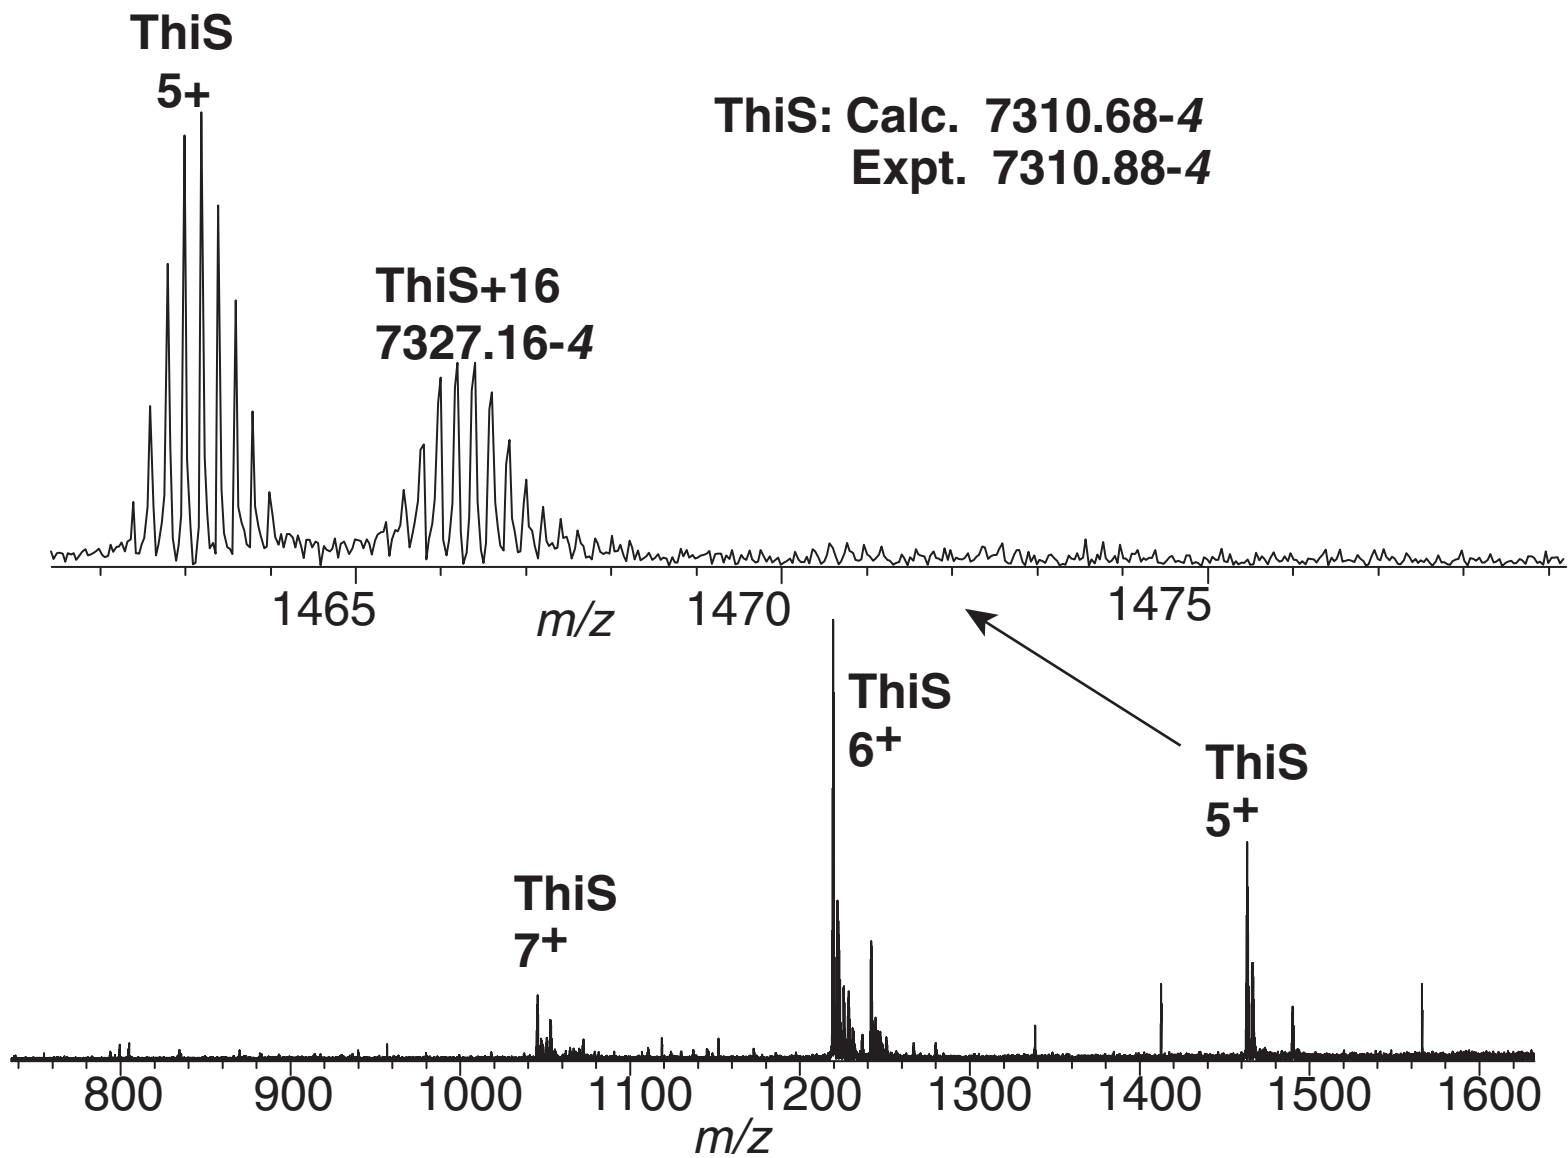

Supplement: pnas_141226698_4.pdf [file pnas_141226698_4.pdf]

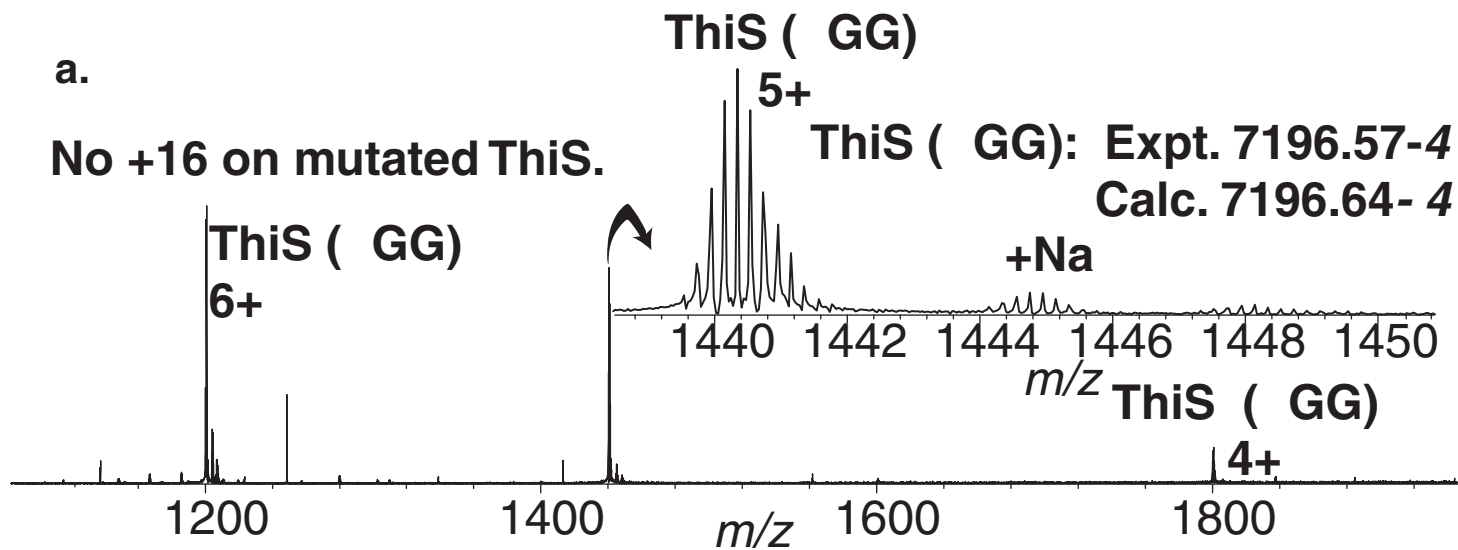

b. No complex observed!

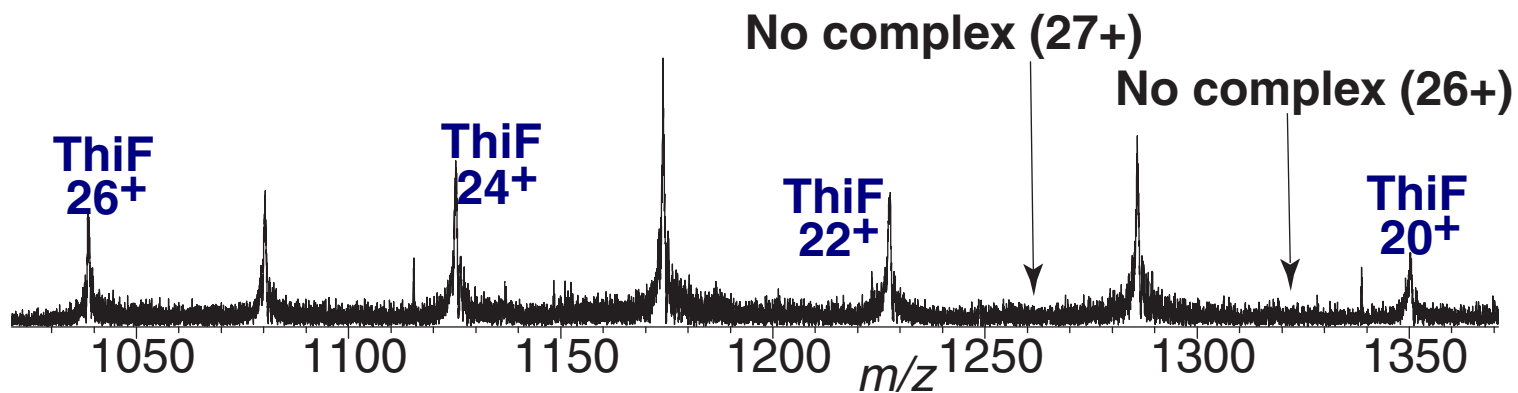

Supplement: pnas_141226698_6.pdf [file pnas_141226698_6.pdf]
